# Supplementary material for: Serum PTH associated with malnutrition determined by bioelectrical impedance technology in chronic kidney disease patients
Source: Research Square preprint supplement (doi:10.21203/rs.3.rs-596127/v1), 2021-06-09
Supplement: Supplementary file 1 [file 792b2ed312b1a1bd6e8a2337.pdf]

**Table 5. Relationship between PTH and low SMI (Binary logistic regression analysis)**

|                    | Model 1              |       |             | Model 2                |       |             |
|--------------------|----------------------|-------|-------------|------------------------|-------|-------------|
|                    | OR (95%CI)           | p     | C statistic | OR (95%CI)             | p     | C statistic |
| PTH $\leq$ 88pg/ml | 0.238 (0.067-0.844)  | 0.026 | 0.641       | 0.085 (0.008-0.928)    | 0.043 | 0.986       |
| PTH $>$ 88pg/ml    | 4.205 (1.185-14.924) |       |             | 11.769 (1.078-128.536) |       |             |

Model 1: Unadjusted;

Model 2: Adjustment factors were gender, age, BMI, hemoglobin, serum calcium, serum phosphorus, serum total cholesterol, serum triglyceride, and basal metabolic rate.
